# Supplementary material for: T-cell responses to KSHV infection: a systematic approach
Source: PubMed Central journal article supplement (PMC5752530; doi:10.18632/oncotarget.22683), 2017-11-25
Supplement: oncotarget-08-109402-s001.pdf [file oncotarget-08-109402-s001.pdf]

## **T-cell responses to KSHV infection: a systematic approach**

### **SUPPLEMENTARY MATERIALS**

#### **Supplementary Table 1: Summary characteristics of study participants**

See Supplementary File 1

#### **Supplementary Table 2: HLA genotypes of study participants**

See Supplementary File 2

#### **Supplementary Table 3: Elispot Count data corresponding to Figure 1**

See Supplementary File 3
